# Supplementary material for: Synthesis and Advanced Characterization of Polymer–Protein Core–Shell Nanoparticles
Source: MDPI journal article supplement (doi:10.3390/catal11060730), 2021-06-13
Supplement: s1 [file s1]

## Supplementary Materials

### Synthesis and Advanced Characterization of Polymer-Protein Core-Shell

#### Nanoparticles

Erik Sarnello<sup>1</sup>, Tao Li<sup>1,2\*</sup>

<sup>1</sup>Department of Chemistry and Biochemistry, Northern Illinois University, DeKalb, Illinois 60115, USA

<sup>2</sup>X-ray Science Division, Argonne National Laboratory, Lemont, Illinois 60439, USA

**Table S1.** CSNP average radius (nm) measured by DLS.

|                      |     | P4VP Concentration (mg/mL) |        |        |        |         |         |         |
|----------------------|-----|----------------------------|--------|--------|--------|---------|---------|---------|
|                      |     | 0.5                        | 1      | 2      | 4      | 6       | 10      | 15      |
| BSA<br>Concentration | 0.5 | 421.07                     | 651.23 | 958    | --     | --      | --      | --      |
|                      | 1   | 309.59                     | 355.84 | 523    | 608.49 | 1333.84 | 4001.12 | 4107.06 |
|                      | 2   | 168                        | 202    | 317    | 374    | 421     | 543     | 602     |
|                      | 4   | 148.81                     | 162.71 | 181.18 | 269.62 | 373.69  | 395.92  | 497.39  |
|                      | 6   | 125.84                     | 145.77 | 161.33 | 173.64 | 229.46  | 294.86  | 419.25  |
|                      | 10  | 78.09                      | 82.23  | 118.44 | 120.42 | 152.79  | 182.24  | 201.72  |
|                      | 15  | 52.27                      | 64.85  | 79.63  | 82.48  | 91.71   | 110.28  | 117.5   |
